# Supplementary material for: Bio-Inspired Magnetically Controlled Reversibly Actuating Multimaterial Fibers
Source: MDPI journal article supplement (doi:10.3390/polym15092233), 2023-05-08
Supplement: s1 [file s1]

## Supporting Information to

### Bio-inspired magnetically controlled reversibly actuating multimaterial fibers

Muhammad Farhan<sup>1</sup>, Daniel S. Hartstein<sup>1</sup>, Yvonne Pieper<sup>1</sup>, Marc Behl<sup>1</sup>, Andreas Lendlein<sup>1,2</sup>, Axel T. Neffe<sup>1</sup>

<sup>1</sup>Institute of Active Polymers, Helmholtz-Zentrum Hereon, Kantstr. 55, 14513 Teltow, Germany

<sup>2</sup>Institute of Chemistry, University of Potsdam, 14469 Potsdam, Germany

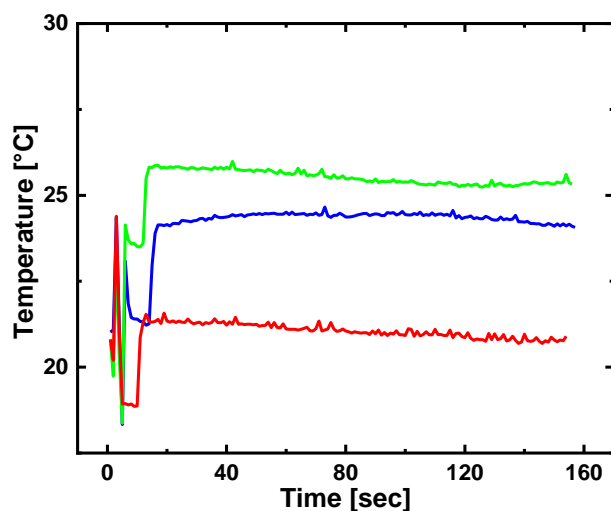

**Figure S1.** Heating profile of PDMS-mNP composite containing  $\alpha$ -Fe<sub>2</sub>O<sub>3</sub> type mNP of 100-200 nm size: PDMS-SP100-5 (red), PDMS-Sp100-15 (green), and PDMS-Sp100-20 (blue).
